# Supplementary material
Source: HighWire-hosted journal article supplement (https://www.annfammed.org/highwire/filestream/8909/field_highwire_adjunct_files/0/Fagnan_Supp_App.pdf)
Supplement: Fagnan_Supp_App.pdf [file Fagnan_Supp_App.pdf]

Supplemental materials for:

Fagnan LJ, Walunas T, Parchman ML, et al. Engaging primary care practices in studies of improvement: did you budget enough for practice recruitment? *Ann Fam Med*. 2018;16(Suppl 1):72-79.

# APPENDIX 1. Cost of Recruitment Template

## COST OF RECRUITMENT TEMPLATE

| Principal Investigator, Director-level Position  |                                       |                                                                                                                              |                                                                          |                                                              |                                                                                              |                                               |
|--------------------------------------------------|---------------------------------------|------------------------------------------------------------------------------------------------------------------------------|--------------------------------------------------------------------------|--------------------------------------------------------------|----------------------------------------------------------------------------------------------|-----------------------------------------------|
| Recruiter                                        | % FTE on Project (year)               | Hours on Project (year)                                                                                                      | % Time on Recruitment for Project                                        | Total Recruitment Hours                                      | Hourly Rate                                                                                  | Recruitment Total                             |
| List recruiter                                   | List recruiter's % FTE on the project | Calculating current hourly rates of basic pay - based on 2087 hours in 52 week work year.<br>Column= % FTE on Project * 2087 | List the recruiter's % time on the project dedicated towards recruitment | Column= Hours on Project * % Time on Recruitment for Project | List the recruiter's hourly rate (see below for breakdown of organization's Operating Costs) | Column= Total Recruitment Hours * Hourly Rate |
|                                                  |                                       | 0                                                                                                                            |                                                                          | 0                                                            |                                                                                              | 0                                             |
|                                                  |                                       | 0                                                                                                                            |                                                                          | 0                                                            |                                                                                              | 0                                             |
|                                                  |                                       | 0                                                                                                                            |                                                                          | 0                                                            |                                                                                              | 0                                             |
|                                                  |                                       | 0                                                                                                                            |                                                                          | 0                                                            |                                                                                              | 0                                             |
|                                                  |                                       | 0                                                                                                                            |                                                                          | 0                                                            |                                                                                              | 0                                             |
|                                                  |                                       | 0                                                                                                                            |                                                                          | 0                                                            |                                                                                              | 0                                             |
|                                                  |                                       | 0                                                                                                                            |                                                                          | 0                                                            |                                                                                              | 0                                             |
|                                                  |                                       | 0                                                                                                                            |                                                                          | 0                                                            |                                                                                              | 0                                             |
|                                                  |                                       | 0                                                                                                                            |                                                                          | 0                                                            |                                                                                              | 0                                             |
| Project Manager, Recruitment Specialist Position |                                       |                                                                                                                              |                                                                          |                                                              |                                                                                              |                                               |
| Recruiter                                        | % FTE on Project (year)               | Hours on Project (year)                                                                                                      | % Time on Recruitment for Project                                        | Total Recruitment Hours                                      | Hourly Rate                                                                                  | Recruitment Total                             |
|                                                  |                                       | 0                                                                                                                            |                                                                          | 0                                                            |                                                                                              | 0                                             |
|                                                  |                                       | 0                                                                                                                            |                                                                          | 0                                                            |                                                                                              | 0                                             |
|                                                  |                                       | 0                                                                                                                            |                                                                          | 0                                                            |                                                                                              | 0                                             |
|                                                  |                                       | 0                                                                                                                            |                                                                          | 0                                                            |                                                                                              | 0                                             |
|                                                  |                                       | 0                                                                                                                            |                                                                          | 0                                                            |                                                                                              | 0                                             |
|                                                  |                                       | 0                                                                                                                            |                                                                          | 0                                                            |                                                                                              | 0                                             |
|                                                  |                                       | 0                                                                                                                            |                                                                          | 0                                                            |                                                                                              | 0                                             |
|                                                  |                                       | 0                                                                                                                            |                                                                          | 0                                                            |                                                                                              | 0                                             |
|                                                  |                                       | 0                                                                                                                            |                                                                          | 0                                                            |                                                                                              | 0                                             |
| Field Facilitator Position                       |                                       |                                                                                                                              |                                                                          |                                                              |                                                                                              |                                               |
| Recruiter                                        | % FTE on Project (year)               | Hours on Project (year)                                                                                                      | % Time on Recruitment for Project                                        | Total Recruitment Hours                                      | Hourly Rate                                                                                  | Recruitment Total                             |
|                                                  |                                       | 0                                                                                                                            |                                                                          | 0                                                            |                                                                                              | 0                                             |
|                                                  |                                       | 0                                                                                                                            |                                                                          | 0                                                            |                                                                                              | 0                                             |
|                                                  |                                       | 0                                                                                                                            |                                                                          | 0                                                            |                                                                                              | 0                                             |
|                                                  |                                       | 0                                                                                                                            |                                                                          | 0                                                            |                                                                                              | 0                                             |
|                                                  |                                       | 0                                                                                                                            |                                                                          | 0                                                            |                                                                                              | 0                                             |
|                                                  |                                       | 0                                                                                                                            |                                                                          | 0                                                            |                                                                                              | 0                                             |
|                                                  |                                       | 0                                                                                                                            |                                                                          | 0                                                            |                                                                                              | 0                                             |
|                                                  |                                       | 0                                                                                                                            |                                                                          | 0                                                            |                                                                                              | 0                                             |
| Research Staff Position                          |                                       |                                                                                                                              |                                                                          |                                                              |                                                                                              |                                               |
| Recruiter                                        | % FTE on Project (year)               | Hours on Project (year)                                                                                                      | % Time on Recruitment for Project                                        | Total Recruitment Hours                                      | Hourly Rate                                                                                  | Recruitment Total                             |
|                                                  |                                       | 0                                                                                                                            |                                                                          | 0                                                            |                                                                                              | 0                                             |
|                                                  |                                       | 0                                                                                                                            |                                                                          | 0                                                            |                                                                                              | 0                                             |
|                                                  |                                       | 0                                                                                                                            |                                                                          | 0                                                            |                                                                                              | 0                                             |
|                                                  |                                       | 0                                                                                                                            |                                                                          | 0                                                            |                                                                                              | 0                                             |
|                                                  |                                       | 0                                                                                                                            |                                                                          | 0                                                            |                                                                                              | 0                                             |
|                                                  |                                       | 0                                                                                                                            |                                                                          | 0                                                            |                                                                                              | 0                                             |
|                                                  |                                       | 0                                                                                                                            |                                                                          | 0                                                            |                                                                                              | 0                                             |
|                                                  |                                       | 0                                                                                                                            |                                                                          | 0                                                            |                                                                                              | 0                                             |

|                         |                |                               |                                                           |
|-------------------------|----------------|-------------------------------|-----------------------------------------------------------|
| 0                       | hours/practice | 0                             | <b>TOTAL RECRUITMENT HOURS &amp; COST FOR XXX PROJECT</b> |
| xxx Recruited Practices |                | total cost/recruited practice |                                                           |

| xxx Operating Costs          |  |
|------------------------------|--|
| Salaries & Fringe            |  |
| Administrative Support       |  |
| Supplies                     |  |
| Professional Services        |  |
| Travel/Conference/Hosting    |  |
| OCA                          |  |
| <b>Total Operating Costs</b> |  |

Determine overall operating costs based on above breakdowns

Column= number of Recruited Practices \* Total Recruitment Hours

Column= number of Recruited Practices \* Recruitment Total

| Service Rate Calculation                         |                       |             |                                              |                 |
|--------------------------------------------------|-----------------------|-------------|----------------------------------------------|-----------------|
| Services Provided                                | Labor (Hours/Service) | Hourly Rate | FY 16 Estimate No. of Hours Service Provided | Costs Recovered |
| Principal Investigator, Director-level Position  | 1.00                  |             |                                              |                 |
| Field Facilitator Position                       | 1.00                  |             |                                              |                 |
| Research Staff Position                          | 1.00                  |             |                                              |                 |
| Data Analyst Position                            | 1.00                  |             |                                              |                 |
| Project Manager, Recruitment Specialist Position | 1.00                  |             |                                              |                 |

Should equal Total Operating costs
